# Supplementary material for: Olefin metathesis-based chemically recyclable polymers enabled by fused-ring monomers
Source: Springer Nature journal article supplement (doi:10.1038/s41557-021-00748-5), 2021-07-22
Supplement: 41557_2021_748_MOESM22_ESM.mol [file 41557_2021_748_MOESM22_ESM.mol]

nchem.20092236B-comp10.mol
  ChemDraw06112119532D

 22 25  0  0  0  0  0  0  0  0999 V2000
   -0.4125    1.0893    0.0000 C   0  0  0  0  0  0  0  0  0  0  0  0
   -0.4125    0.2643    0.0000 C   0  0  0  0  0  0  0  0  0  0  0  0
    0.4125    0.2643    0.0000 C   0  0  0  0  0  0  0  0  0  0  0  0
    0.4125    1.0893    0.0000 C   0  0  0  0  0  0  0  0  0  0  0  0
   -0.6676   -0.5202    0.0000 C   0  0  0  0  0  0  0  0  0  0  0  0
    0.0000   -1.0053    0.0000 N   0  0  0  0  0  0  0  0  0  0  0  0
    0.6676   -0.5202    0.0000 C   0  0  0  0  0  0  0  0  0  0  0  0
    1.4522   -0.7753    0.0000 O   0  0  0  0  0  0  0  0  0  0  0  0
   -1.4522   -0.7753    0.0000 O   0  0  0  0  0  0  0  0  0  0  0  0
    0.0000   -1.8303    0.0000 C   0  0  0  0  0  0  0  0  0  0  0  0
   -0.7142   -2.2428    0.0000 C   0  0  0  0  0  0  0  0  0  0  0  0
   -0.7142   -3.0678    0.0000 C   0  0  0  0  0  0  0  0  0  0  0  0
    0.0000   -3.4803    0.0000 C   0  0  0  0  0  0  0  0  0  0  0  0
    0.7150   -3.0678    0.0000 C   0  0  0  0  0  0  0  0  0  0  0  0
    0.7150   -2.2428    0.0000 C   0  0  0  0  0  0  0  0  0  0  0  0
    0.9274    1.7340    0.0000 C   0  0  0  0  0  0  0  0  0  0  0  0
    0.7433    2.5384    0.0000 O   0  0  0  0  0  0  0  0  0  0  0  0
    0.0000    2.8967    0.0000 C   0  0  0  0  0  0  0  0  0  0  0  0
   -0.7433    2.5384    0.0000 O   0  0  0  0  0  0  0  0  0  0  0  0
   -0.9266    1.7340    0.0000 C   0  0  0  0  0  0  0  0  0  0  0  0
   -0.5828    3.4803    0.0000 C   0  0  0  0  0  0  0  0  0  0  0  0
    0.5836    3.4803    0.0000 C   0  0  0  0  0  0  0  0  0  0  0  0
  1  2  1  0      
  2  3  1  0      
  3  4  1  0      
  4  1  1  0      
  2  5  1  1      
  5  6  1  0      
  3  7  1  1      
  7  8  2  0      
  5  9  2  0      
  6 10  1  0      
 10 11  2  0      
 11 12  1  0      
 12 13  2  0      
 13 14  1  0      
 14 15  2  0      
 15 10  1  0      
  6  7  1  0      
  4 16  1  6      
 16 17  1  0      
 17 18  1  0      
 18 19  1  0      
 19 20  1  0      
  1 20  1  6      
 18 21  1  0      
 18 22  1  0      
M  END
